# Supplementary material for: Interaction of Tau with Kinesin-1: Effect of Kinesin-1 Heavy Chain Elimination on Autophagy-Mediated Mutant Tau Degradation
Source: MDPI journal article supplement (doi:10.3390/biomedicines12010005), 2023-12-19
Supplement: s1 [file s1]

## Supplementary Figures

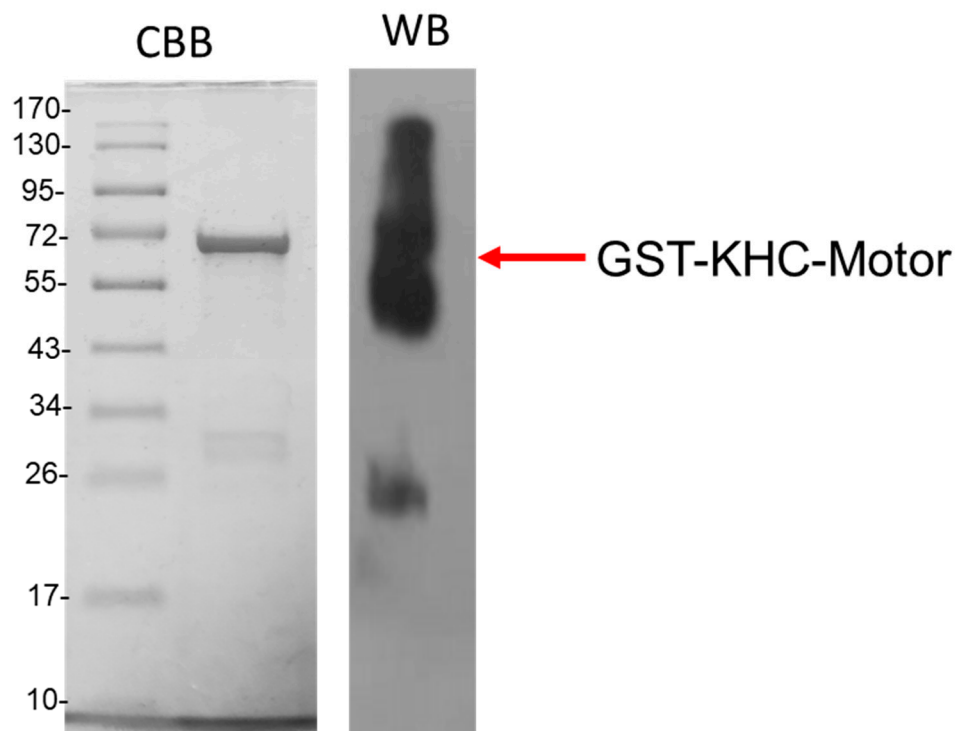

Suppl. Figure S1. Assessing the purity and identity of recombinant GST-Kinesin-Motor (1-323) domain by SDS-PAGE/Commassie Brilliant Blue staining (CBB) and western blotting (WB). The lower bands indicate the degradative product of the recombinant protein.

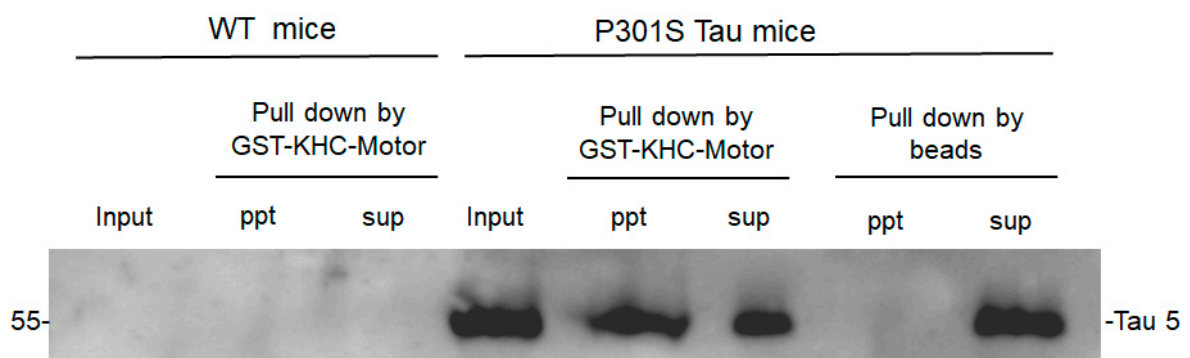

Suppl.Figure S2. KHC-Motor protein pulldowned tau from P301S Tau mouse brain lysate but not from WT mice brain lysate.

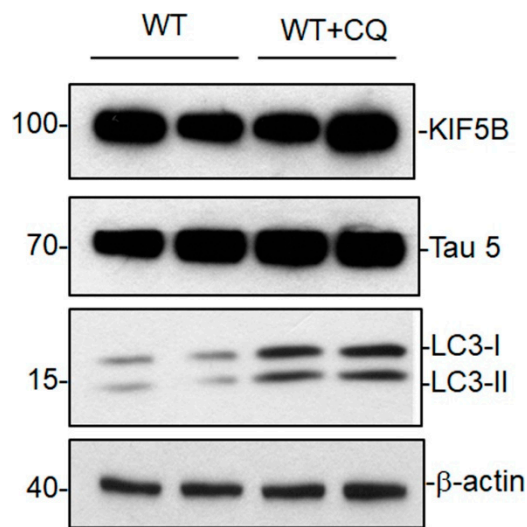

Supply.Figure S3. Tau levels were determined by western blotting with or without CQ treatment in HAP1-WT cells.

**Supplementary Table S1:** All interacting residues that are involved in hydrophobic, H-bonding, and salt-bridge interactions at the Tau-KIF5B interface

| Hydrophobic interactions |             |
|--------------------------|-------------|
| KIFB Residue             | Tau Residue |
| TYR-138                  | VAL-248     |
| TYR-138                  | VAL-248     |
| LEU-139                  | GLN-244     |
| LYS-141                  | MET-250     |
| LYS-141                  | ASP-252     |
| LYS-141                  | THR-414     |
| VAL-148                  | PRO-218     |
| VAL-192                  | PRO-218     |
| ALA-193                  | PRO-249     |
| ALA-193                  | PRO-219     |
| VAL-194                  | PRO-247     |
| VAL-194                  | VAL-248     |
| THR-195                  | PRO-247     |
| ASN-196                  | PRO-247     |
| GLU-199                  | PRO-247     |
| LYS-240                  | ARG-406     |
| GLU-244                  | ARG-406     |
| ARG-278                  | GLU-431     |
| H-Bond interactions      |             |
| KIF5B Residue            | Tau Residue |
| ASN-152                  | ASP-252     |
| LYS-240                  | ARG-406     |
| LYS-240                  | SER-409     |

|                      |                    |
|----------------------|--------------------|
| GLU-244              | HIS-407            |
| ALA-251              | ASN-410            |
| LYS-256              | THR-414            |
| <b>Salt-Bridges</b>  |                    |
| <b>KIF5B Residue</b> | <b>Tau Residue</b> |
| LYS-141              | ASP-252            |
| LYS-141              | ASP-421            |
| LYS-141              | GLU-36             |
| ASP-249              | ARG-406            |
| LYS-256              | ASP-421            |
| LYS-281              | ASP-421            |
| LYS-281              | GLU-36             |
| ARG-284              | GLU-431            |

Interacting residues at the ATP binding domain of Kif5b are highlighted in dark green, and those near the ATP binding domain are highlighted in light green.
